# Supplementary material for: Real-World Impact of a Pharmacogenomics-Enriched Comprehensive Medication Management Program
Source: J Pers Med. 2022 Mar 8;12(3):421. doi: 10.3390/jpm12030421 (PMC8949247; doi:10.3390/jpm12030421)
Supplement: Supplementary file 1 [file jpm-12-00421-s001.zip › jpm-1577816-supplementary.pdf]

# Supplementary Materials

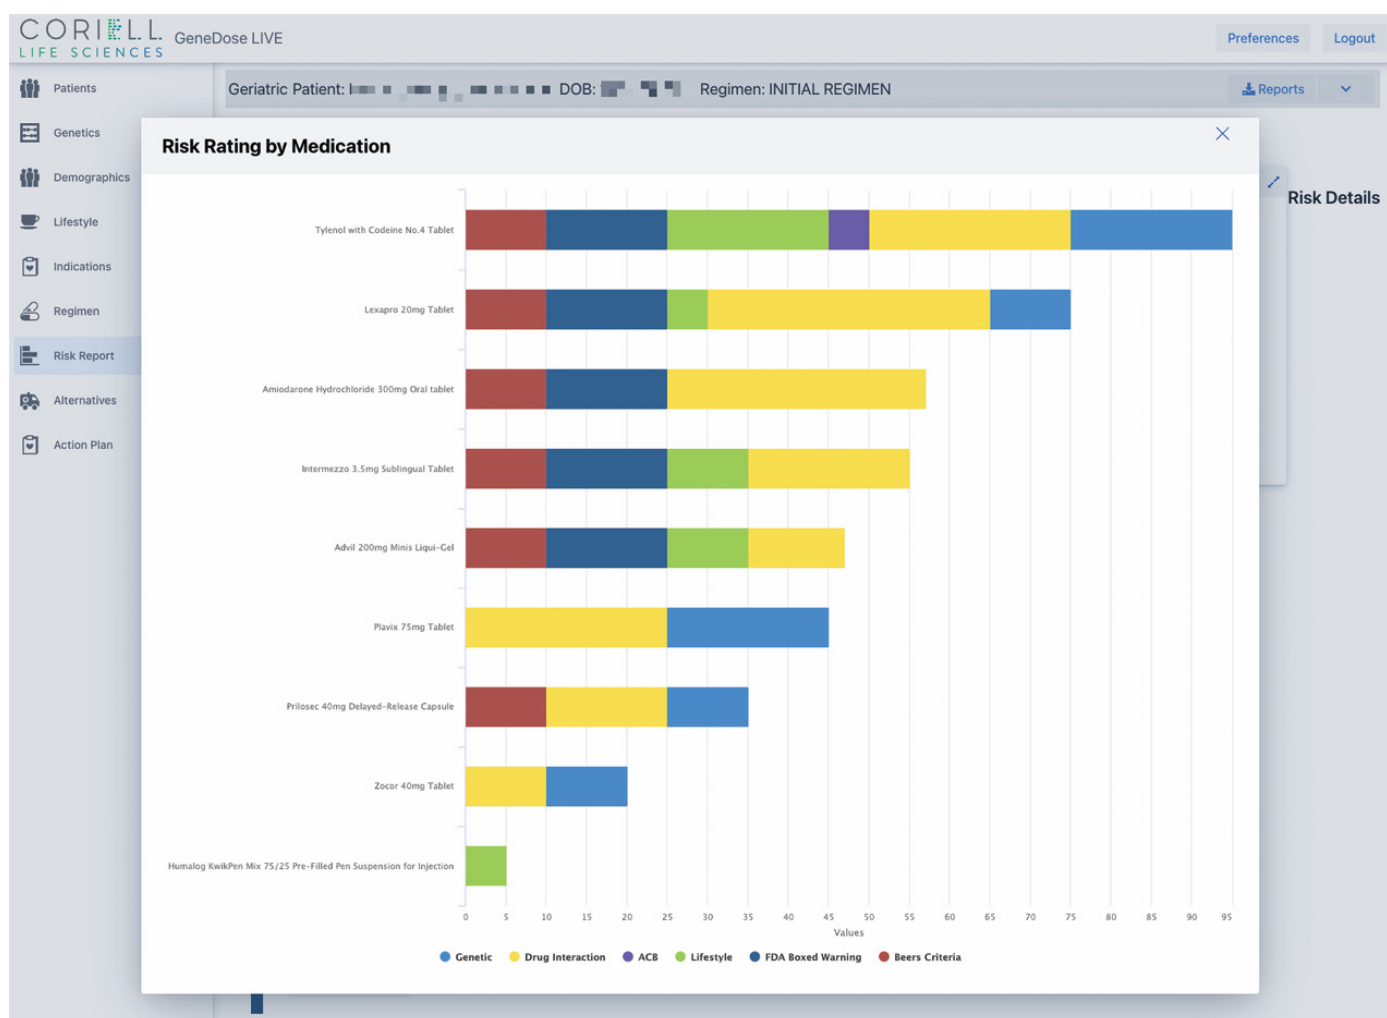

**Figure S1.** The comprehensive clinical decision support system (CDSS; GeneDose LIVE™, Coriell Life Sciences) Risk Chart—a data visualization of the magnitude of medication risks across nine potential sources. This CDSS facilitated both the unification of pharmacogenomics with comprehensive medication management (PGx + CMM) and the development of pharmacist-mediated medication action plans (MAPs) that were observed to drive large-scale changes in economics and healthcare resource utilization. Several additional CDSS tools are visible in the left-most menu bar.

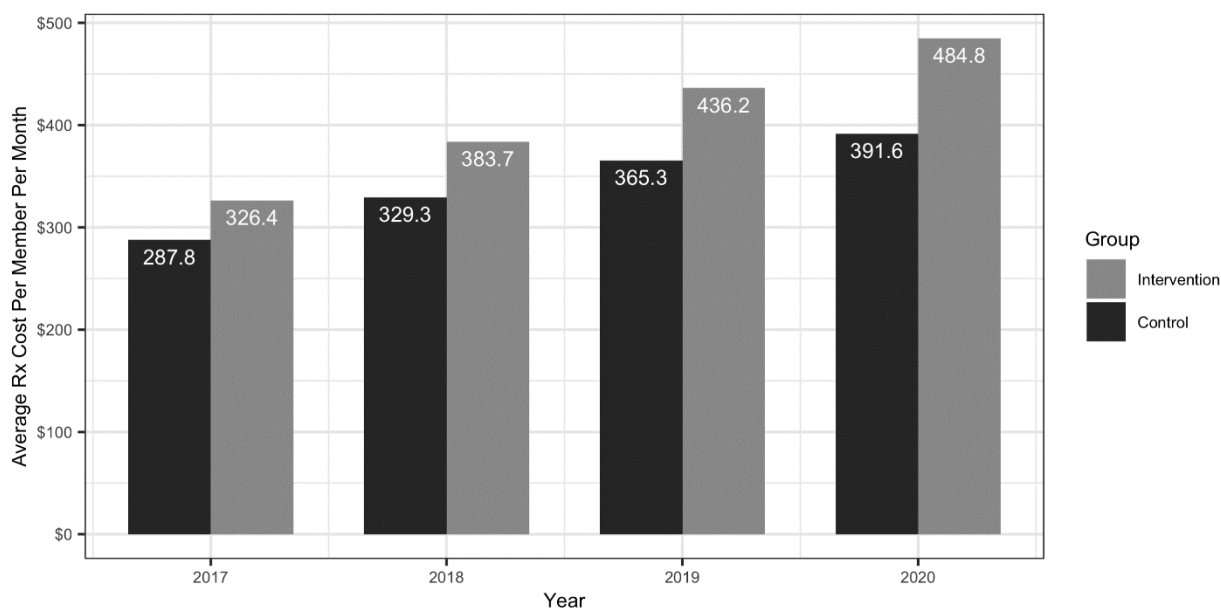

**Figure S2.** Average pharmacy claims cost per patient per month (PMPM) by year for the intervention and control groups. Abbreviation: Rx, prescription.

**Table S1.** Genes assayed for the PGx-enriched comprehensive medication management program.

| Assayed Gene   | Alleles                                                                                                                                                | Reported |
|----------------|--------------------------------------------------------------------------------------------------------------------------------------------------------|----------|
| <i>ADRA2A</i>  | c.-1291C>G                                                                                                                                             | Yes      |
| <i>ANKK1</i>   | c.2137G>A                                                                                                                                              | Yes      |
| <i>COMT</i>    | c.472G>A                                                                                                                                               | Yes      |
| <i>CYP1A2</i>  | *1C, *1D, *1E, *1F, *1J, *1K, *1L, *1N, *1W                                                                                                            | No       |
| <i>CYP2B6</i>  | *5, *6, *7, *16, *22, *34                                                                                                                              | No       |
| <i>CYP2C8</i>  | *1C, *2, *3, *4                                                                                                                                        | Yes      |
| <i>CYP2C9</i>  | *2, *3, *4, *5, *6, *8, *11, *27                                                                                                                       | Yes      |
| <i>CYP2C19</i> | *17, *4A, *4B, *5, *6, *7, *8, *9, *10, *3, *2                                                                                                         | Yes      |
| <i>CYP2D6</i>  | *2A, *4A, *4J, *4M, *5, *6A, *6C, *7, *8, *9, *10A, *11A, *12, *14, *15, *17, *29, *35A, *36, *41, *64, *69, *82, *91, *109, *114, CNVs (duplications) | Yes      |
| <i>CYP3A4</i>  | *1B, *2, *3, *12, *17, *22                                                                                                                             | Yes      |
| <i>CYP3A5</i>  | *2, *3B, *3C, *6, *7, *8, *9                                                                                                                           | Yes      |
| <i>CYP4F2</i>  | *3                                                                                                                                                     | Yes      |
| <i>F2</i>      | c.*97G>A                                                                                                                                               | Yes      |
| <i>F5</i>      | c.1601G>A                                                                                                                                              | Yes      |
| <i>GRIK4</i>   | c.83-10039T>C                                                                                                                                          | No       |
| <i>HLA-B</i>   | *1502                                                                                                                                                  | Yes      |
| <i>HTR2A</i>   | c.362-2211T>C                                                                                                                                          | No       |
| <i>HTR2C</i>   | c.-759C>T                                                                                                                                              | No       |
| <i>IFNL3</i>   | c.151-152G>A, g.1332A>C                                                                                                                                | No       |
| <i>MTHFR</i>   | c.1298A>C, c.677C>T                                                                                                                                    | Yes      |
| <i>OPRM1</i>   | c.118A>G                                                                                                                                               | Yes      |
| <i>SLCO1B1</i> | *5                                                                                                                                                     | Yes      |
| <i>VKORC1</i>  | *2                                                                                                                                                     | Yes      |

A DNA collection kit (Oragene•Dx® OGD-510, DNA Genotek, Ontario, Canada) was sent to the enrollee for sample collection. Allelic discrimination was performed by TaqMan® OpenArray Genotyping on the QuantStudio™ 12K Flex Real-Time PCR System (Thermo Fisher Scientific, Waltham, MA, USA) according to standard protocols. Copy number variation (CNV) determination of *CYP2D6* exon 9 was evaluated on the same instrument utilizing CopyCaller® software. For each *CYP450* gene, *SLCO1B1*, *TPMT*, and *VKORC1* genes, the absence of a positive assay result for an included variant resulted in a \*1 (wild type) designation.

**Table S2.** Organization by the CMS Place of Service Codes for Professional Claims for program Evaluation.

| Category   | Code | Place of Service                                | Code | Place of Service                                   |
|------------|------|-------------------------------------------------|------|----------------------------------------------------|
| Outpatient | 3    | School                                          | 49   | Independent Clinic                                 |
|            | 5    | Indian Health Service                           | 50   | Federally Qualified Health Center                  |
|            | 11   | Office                                          | 52   | Psychiatric Facility-Partial Hospitalization       |
|            | 15   | Mobile Unit                                     | 53   | Community Mental Health Center                     |
|            | 17   | Walk-in Retail Health Clinic                    | 57   | Non-residential Substance Abuse Treatment Facility |
|            | 18   | Place of Employment–Worksite                    | 60   | Mass Immunization Center                           |
|            | 19   | Off Campus–Outpatient Hospital                  | 62   | Comprehensive Outpatient Rehabilitation Facility   |
|            | 20   | Urgent Care Facility                            | 65   | End-Stage Renal Disease Treatment Facility         |
|            | 22   | On Campus–Outpatient Hospital                   | 71   | Public Health Clinic                               |
|            | 24   | Ambulatory Surgical Center                      | 72   | Rural Health Clinic                                |
| Inpatient  | 21   | Inpatient Hospital                              |      |                                                    |
|            | 51   | Inpatient Psychiatric Facility                  |      |                                                    |
|            | 61   | Comprehensive Inpatient Rehabilitation Facility |      |                                                    |
| Emergency  | 23   | Emergency Room–Hospital                         |      |                                                    |
|            | 41   | Ambulance–Land                                  |      |                                                    |
|            | 42   | Ambulance–Air or Water                          |      |                                                    |

List of available Place of Service codes [37] in the analyzed administrative medical claims and their categorization as outpatient, inpatient, or emergency.
